# Supplementary material
Source: PubMed Central journal article supplement (PMC7658622)

## A Infection

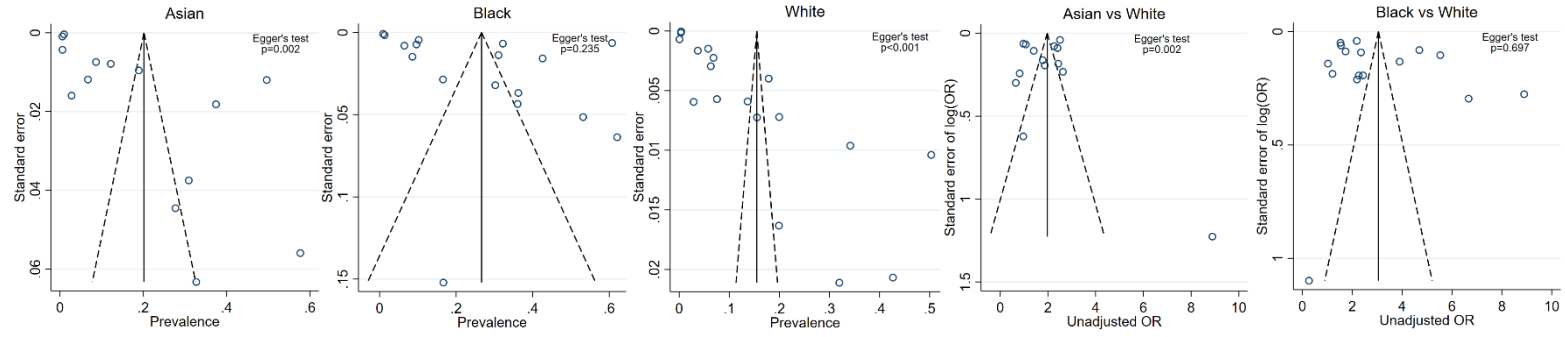

## B ICU admission

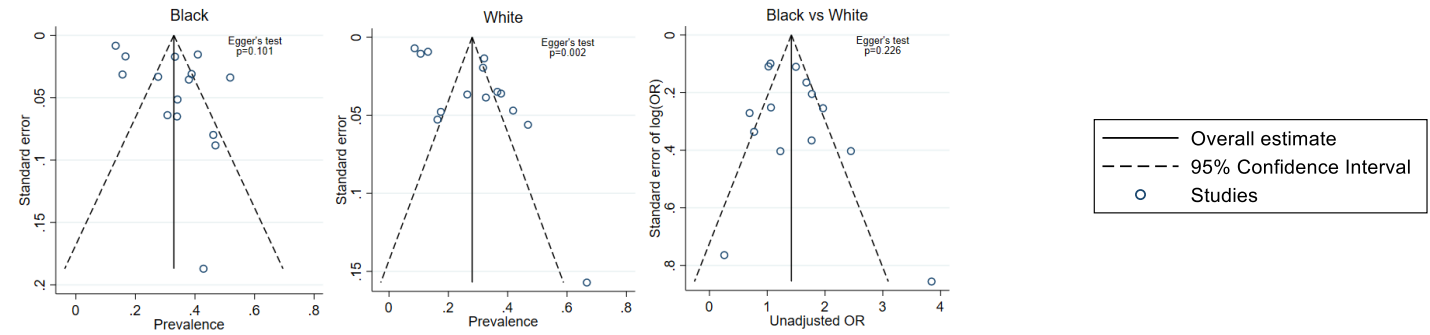

## C Mortality

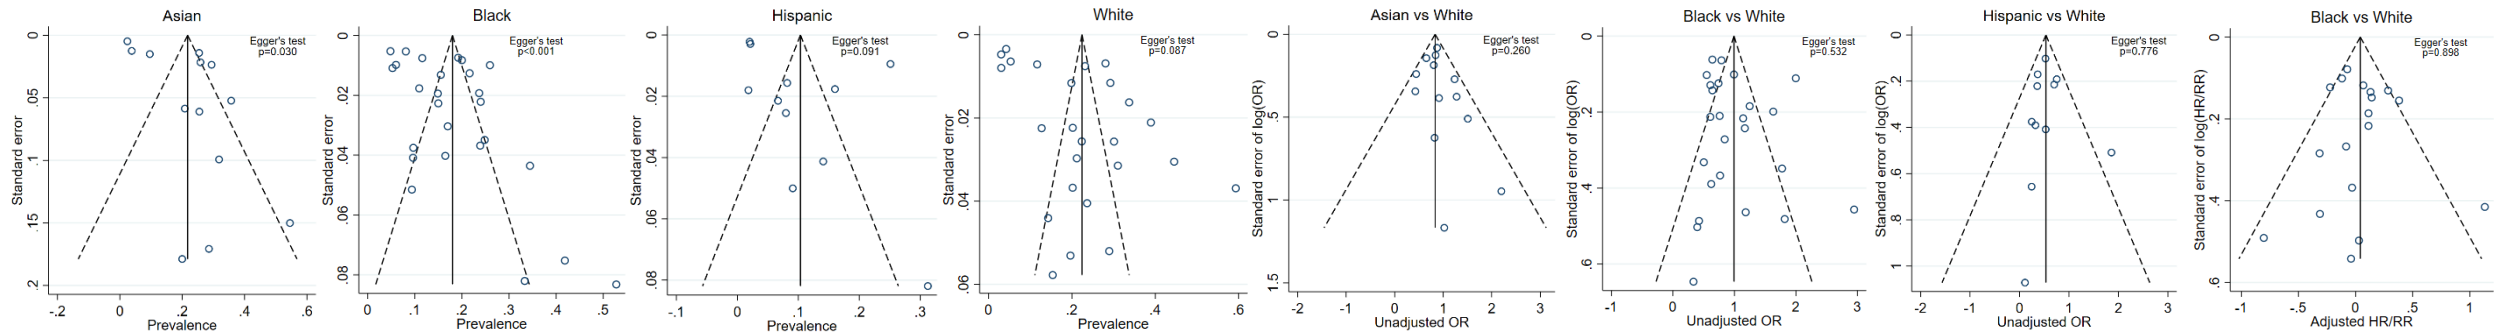

Supplement: mmc2.pdf [file mmc2.pdf]
